# Supplementary material for: Shallow-Water Hydrothermal Vents as Natural Accelerators of Bacterial Antibiotic Resistance in Marine Coastal Areas
Source: MDPI journal article supplement (doi:10.3390/microorganisms10020479), 2022-02-21
Supplement: s1 [file s1]

***Supplementary Materials***

# **Shallow-Water Hydrothermal Vents as Natural Accelerators of Bacterial Antibiotic Resistance in Marine Coastal Areas**

Erika Arcadi\*, Eugenio Rastelli\*, Michael Tangherlini, Carmen Rizzo, Monique Mancuso, Marilena Sanfilippo, Valentina Esposito, Franco Andaloro, Teresa Romeo

**This file includes:**

Supplementary Tables S1–S2

Supplementary Figure S1

**Table S1.** Concentrations of HMs in the sediments collected in this study. Reported are average values (in  $\mu\text{g g}^{-1}$ ) and SDs.

|    | "Hot" vent       | "Cold" vent      | Bottaro Crater    |
|----|------------------|------------------|-------------------|
| Al | 10767 $\pm$ 1365 | 9675 $\pm$ 650   | 5333 $\pm$ 351    |
| As | 13.4 $\pm$ 1.5   | 15.3 $\pm$ 3.4   | 87.8 $\pm$ 64.0   |
| Cd | 0.03 $\pm$ 0.00  | 0.03 $\pm$ 0.01  | 0.04 $\pm$ 0.01   |
| Cr | 5.6 $\pm$ 0.7    | 6.4 $\pm$ 0.5    | 17.8 $\pm$ 2.0    |
| Fe | 17333 $\pm$ 577  | 15250 $\pm$ 1258 | 18401 $\pm$ 11961 |
| Mn | 71.8 $\pm$ 8.9   | 81.5 $\pm$ 11.1  | 550 $\pm$ 564     |
| Hg | 0.06 $\pm$ 0.01  | 0.09 $\pm$ 0.05  | 0.12 $\pm$ 0.07   |
| Ni | 3.3 $\pm$ 0.6    | 3.5 $\pm$ 0.4    | 3.2 $\pm$ 1.7     |
| Pb | 7.7 $\pm$ 0.8    | 9.0 $\pm$ 1.2    | 27.7 $\pm$ 3.0    |
| Cu | 19.1 $\pm$ 3.4   | 18.5 $\pm$ 1.3   | 6.1 $\pm$ 4.3     |
| V  | 61.4 $\pm$ 6.4   | 66.1 $\pm$ 6.0   | 118.4 $\pm$ 62.8  |
| Zn | 20.5 $\pm$ 5.0   | 20.1 $\pm$ 0.8   | 38.1 $\pm$ 13.0   |

**Table S2.** List of primers used in this study, with details of gene function, primer sequence, annealing temperature, amplicon size and detailed related references.

| Name        | Gene function                      | Primers sequences (5'-3')                             | Annealing temperatures (°C) | Amplicon size (bp) | References            |
|-------------|------------------------------------|-------------------------------------------------------|-----------------------------|--------------------|-----------------------|
| <i>arsB</i> | Arsenite efflux ATP ase            | GGTCTATGCGCTGGAGCAATTGAA<br>TGCTGGGCATGTTGTTCAATACCG  | 46                          | 500                | Bouskill et al., 2007 |
| <i>czcA</i> | Cobalt/Zinc/Cadmium efflux protein | GTTACCTTGCTCTTCGCCATGTT<br>ACAGGTTGCGGATGAAGGAGATCA   | 63                          | 320                | Bouskill et al., 2007 |
| <i>copA</i> | Copper translocating ATPase        | CGGTCTCTA CGAATACCGCTTCAA<br>GAAATAGCTCATTGCCGAGGCGTT | 55                          | 300                | Bouskill et al., 2007 |
| <i>merA</i> | Hg reductase                       | GAAGCGGGTGAAGTATCC<br>TCGTCAGGTAGGGGAACAAC            | 53                          | 500                | Larose et al., 2013   |
| <i>pbrT</i> | Pb uptake protein                  | AGCGCGCCCAGGAGCGCAGCG<br>TCTTGGCTCGAAGCCGTCGAGRTA     | 55                          | 450                | Roosa et al., 2014    |

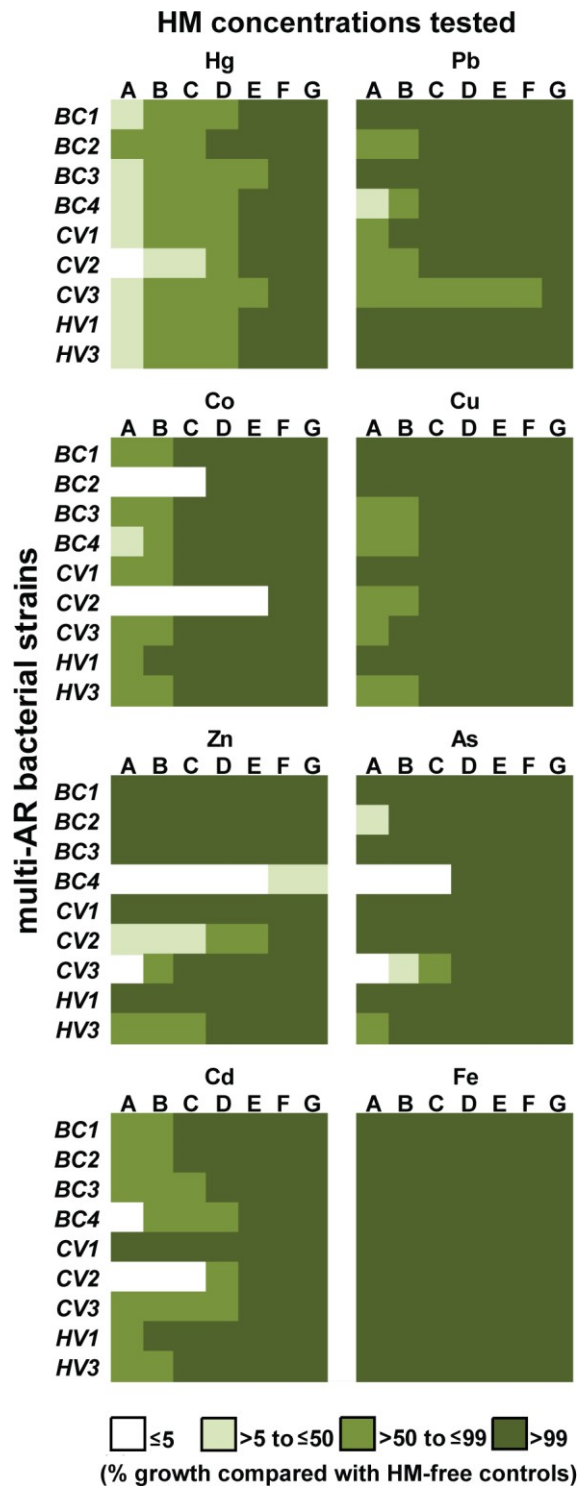

**Figure S1. Results of the physiological tests conducted on the multi-AR bacterial strains identified in this study, to assess their tolerance/resistance to different heavy metals.** Letters form A to G indicate the different concentrations at which each HM was tested (A=10000 ppm, B=5000 ppm, C=1000 ppm, D=500 ppm, E=100 ppm, F=50 ppm, G=10 ppm). The color legend shows the different growth levels of each strain at each of the concentrations tested, compared with growth in the respective HM-free controls.
